# Supplementary material
Source: PubMed Central journal article supplement (PMC2841943)
Supplement: 0913760107_pnas.0913760107_SI.pdf [file 0913760107_pnas.0913760107_SI.pdf]

# Supporting Information

Koval et al. 10.1073/pnas.0913760107

## SI Text

**SI Materials and Methods. Ventricular myocyte isolation and viral infection.** Adult male New Zealand white rabbits (1.5–2 kg) were anesthetized by sodium pentobarbital (50 mg/mL) with Heparin (55 units/mL) through i.v. injection (1 mL/1 kg). Hearts were excised, perfused retroaortically (Langendorff), and enzymatically digested with a mixture of collagenase (Type 2) (Worthington, 250 units/mL), hyaluronidase (Sigma, 0.01%), and protease Type XIV (Sigma, 0.0025%) in a modified Tyrode's solution (0.1 mM CaCl<sub>2</sub>, 10 mM BDM). Dissociated cardiomyocytes were washed three times in Joklik MEM (Sigma) with 1% Pen/Strep and 1X ITS (Sigma) with increasing Ca<sup>2+</sup> (0.25, 0.5, 0.75 mM). Ventricular myocytes were plated on glass coverslips (glass #1) coated with Geltrex (Invitrogen, thin layer) and allowed to attach for 1 h. Cells were washed with a culture media consisting of a 50:50 mix of DMEM and F10 media with 1% Pen/Strep and 1X ITS. Attached cardiomyocytes were counted and the cell density was calculated. Multiplicity of infection was 1–3 viral particles per cell.

**$\beta$ -subunits.** The open reading frame of rat  $\beta_{2a}$  (accession no. NM\_053851.1) with an N-terminal FLAG tag was amplified by PCR, as described (1), and ligated into the adenoviral vector pacAd5CMVmcSIRESegFPpA (Gene Transfer Vector Core at the University of Iowa, GTVC). The  $\beta_{2a}$  mutants were created by using the QuikChange Mutagenesis Kit, essentially as described by the manufacturer (Stratagene). The identities of all mutant and WT cDNA sequences were confirmed by sequencing.

**CaMKII, constitutively active CaMKII and CaMKII inhibition.** We inhibited CaMKII activity by two approaches. We expressed the neuronal endogenous CaMKII inhibitory peptide CaMKIIN (2) in cultured rabbit ventricular myocytes using the cDNA for HA-tagged CaMKIIN (3) inserted into the shuttle vector pacAd5 CMV IRES eGFP pA using the BamHI and EcoRI restriction sites. In some cases we dialyzed cells with CaMKIIN peptide (10  $\mu$ mol/L). The second approach was to infect ventricular myocytes with shRNA against CaMKII $\delta$  inserted into lentivirus, as previously described with minor modifications (4). The shRNA were targeted to a conserved sequence of the mouse and rabbit CaMKII $\delta$  transcript.

Murine CaMKII $\delta$  (accession no. NM\_001025438.1) coding sequences were engineered into the pCMV-HA (Clontech Laboratories) to create an N-terminal tag, then shuttled into pCDH lentivector (System Biosciences, SBI). Lentivirus or adenovirus recombination, amplification, and purification were performed by GTVC, as described (4). The cDNA encoding a constitutively active CaMKII $\delta$  (T287D) mutant was created by using the QuikChange Mutagenesis Kit, essentially as described by the manufacturer (Stratagene). The identities of all mutant and WT cDNA sequences were confirmed by sequencing.

Constitutively active CaMKII protein allowed for independent control of “cytoplasmic” (bath) [Ca<sup>2+</sup>]<sub>i</sub> and CaMKII activity, while using Ba<sup>2+</sup> as the charge carrier in single L-type Ca<sup>2+</sup> channel (LTCC) recording experiments with cell membrane patches. Monomeric CaMKII (amino acid residues 1–380 of mouse type II,  $\alpha$ -isoform) was expressed in baculovirus and purified with a CaM affinity column. The purified CaMKII was made Ca<sup>2+</sup>-CaM independent by thiophosphorylation of Thr 286 in the presence of Ca<sup>2+</sup>, CaM, Mg<sup>2+</sup>, and adenosine 5'-O-(3-thiotriphosphate); Ca<sup>2+</sup>-CaM-independent activity was verified with a phosphorylation assay using a synthetic CaMKII substrate,

autocamtide. Constitutively active CaMKII was used at a final concentration of 0.5  $\mu$ mol/L, to approximate physiological activity (5).

**Confocal microscopy and immunofluorescence.** Cultured ventricular myocytes on coverslips (glass #1), were paced by field stimulation (Ion Optix C-pace and C-dish, 1 Hz, 35V, 2 ms) for 5 min in Tyrode's solution (1.8 mmol/L CaCl<sub>2</sub>, 37 °C). Immediately following the pacing protocol, ventricular myocytes were fixed for 20 min in 2% paraformaldehyde (25 °C). Fixed cells were permeabilized for 10 min with PBS with 0.1% Triton X-100, 2 mg/mL BSA, and 2% fish gelatin. Permeabilized cells were blocked with PBS with 2 mg/mL BSA and 2% fish gelatin. Cells were incubated overnight (4 °C) in one of the following: anti-FLAG conjugated Alexa 488 Ig (Molecular Probes), HA Ig (Santa Cruz), Ca<sub>v</sub>1.2 [Affinity BioReagents (ABR)], pCaMKII Thr286 Ig (ABR), CaMKII Ig, and washed. The cells incubated with FLAG Ig or Ca<sub>v</sub>1.2 Ig were then incubated in donkey anti-rabbit Alexa 488 Ig (Molecular Probes) at 4 °C. Cells incubated with pCaMKII Thr286 Ig were then incubated in donkey anti-mouse 568 (Molecular Probes). Cells incubated with CaMKII Ig were then incubated in donkey anti-rabbit 568 (Molecular Probes). Ventricular myocytes were mounted with glass coverslips and Vectashield (with or without DAPI; Vector Laboratories). Ventricular myocyte images were collected on a Zeiss 510 Meta confocal microscope (Carl Zeiss), under 40x magnification (oil, 1.30 N.A. lens), with a pinhole of 1.0 airy disc (Carl Zeiss), using the Zeiss image acquisition software. All images were exported to Photoshop (Adobe) for cropping and linear adjustment of contrast.

**Electrophysiology.** Voltage and current signals were measured with an Axon 200B patch-clamp amplifier controlled by a personal computer using a Digidata 1320A acquisition board driven by pClamp 8.0 software (Axon Instruments). Electrophysiological recordings were only obtained from Ca<sup>2+</sup>-tolerant, rod-shaped ventricular cells. We used perforated (amphotericin B) patch for I<sub>Ca</sub> and action potential studies, according to our previous publications (6), except for excitation-contraction coupling (ECC) gain measurements, where we used conventional whole-cell mode to optimize Ca<sup>2+</sup> indicator. We used whole-cell mode for sarcoplasmic reticulum (SR) Ca<sup>2+</sup> content measurements in order to develop conditions to approximately match SR Ca<sup>2+</sup> content for ECC gain studies (7). All experiments were conducted at T = 35 °C. Recording pipettes, fabricated from borosilicate glass, had tip diameters of 2–3  $\mu$ m and resistance of 2–4 M $\Omega$ , when filled with recording solution. All solutions were adjusted to 275–295 mOsm.

**Action Potentials.** Action potentials were evoked by brief current pulses 1.5–4 pA, 0.5–1 ms. Action potential duration (APD) was assessed as the time from the AP upstroke to 90% repolarization to baseline (APD<sub>90</sub>). APD<sub>90</sub> was calculated in the absence of early afterdepolarizations (EADs) unless otherwise noted. EADs were identified as interruptions in the process of AP repolarization, as described (8).

**Conventional whole-cell mode voltage clamp studies.** The intracellular solution contained (in mmol/L): CsCl 120, CaCl<sub>2</sub> 3, tetraethylammonium chloride 10, MgATP 1, NaGTP 1, phosphocreatine 5, Hepes 10, and EGTA 10, titrated to pH 7.2 with 1 mol/L CsOH. The cells were bathed in 137 mmol/L NMDG, 10 mmol/L Hepes,

10 mmol/L glucose, 1.8 mmol/L  $\text{CaCl}_2$ , 0.5 mmol/L  $\text{MgCl}_2$ , and 25 mmol/L CsCl titrated to pH 7.4 with 12.1 mol/L HCl (9).

**Perforated patch recordings.** APs were recorded using the perforated (amphotericin B) patch-clamp technique (6, 10) at  $36 \pm 1^\circ\text{C}$  in Tyrode's solution (bath) with the pipette filled with (mmol/L) 130 potassium aspartate, 10 NaCl, 10 Hepes, 0.04  $\text{CaCl}_2$ , 2.0 MgATP, 7.0 phosphocreatine, 0.1 NaGTP, and amphotericin B 240  $\mu\text{g}/\text{mL}$ , with the pH adjusted to 7.2 with KOH.

**SR  $\text{Ca}^{2+}$  content measurements.** SR  $\text{Ca}^{2+}$  content measurements were performed by integrating the  $\text{Na}^+/\text{Ca}^{2+}$  exchanger currents in response to a "spritz" of caffeine (11). Briefly, cells were held at  $-80$  mV for  $>5$  min for adequate dialysis with pipette solutions before initiating experiments. L-type  $\text{Ca}^{2+}$  current ( $I_{\text{Ca}}$ ) was activated by stepping the cell membrane from  $-80$  to  $0$  mV for 300 ms at 0.5 Hz. The bath solution contained (in mmol/L): 137 NaCl, 10 Hepes, 10 glucose, 1.8  $\text{CaCl}_2$ , 0.5  $\text{MgCl}_2$ , 25 CsCl, pH was adjusted to 7.4 with NaOH. The intracellular pipette solution contained (in mmol/L): 120 CsCl, 10 tetraethylammonium chloride (TEA), 1.0 MgATP, 1.0 NaGTP, 5.0 phosphocreatine, 10 Hepes, Indo-1 0.2, and pH was adjusted to 7.2 with 1.0 N CsOH. Voltage-activated  $\text{Na}^+$  current was inactivated by a 50 ms depolarization step to  $-40$  mV, before completing the depolarization to  $0$  mV. The  $\text{K}^+$  currents were eliminated by adding  $\text{Cs}^+$  and TEA and omitting  $\text{K}^+$  from the pipette and bath solutions. After loading  $\text{Ca}^{2+}$  with  $>15$  conditioning command steps, caffeine 20 mmol/L was locally applied by a pipette close to cell of study (DAD-12 Superfusion System, ALA Scientific Instruments.), while cell was holding at  $-80$  mV. The  $\text{Na}^+/\text{Ca}^{2+}$  exchanger currents induced by caffeine were integrated and normalized to cell size. We measured the relationship between the number of conditioning steps and SR  $\text{Ca}^{2+}$  loading and found that four conditioning steps results in  $\sim 38\%$  SR repletion, while  $\geq 10$  conditioning steps results in maximum SR content with 15 pre-pacing ( $n = 3$ ).

**Simultaneous voltage clamp recording of  $\text{Ca}^{2+}$  current and confocal  $\text{Ca}^{2+}$  imaging.** Simultaneous voltage clamp recording of  $\text{Ca}^{2+}$  current and confocal  $\text{Ca}^{2+}$  imaging experiments were performed at  $35^\circ\text{C}$  in ruptured whole-cell configuration. The  $\text{Ca}^{2+}$  indicator, Fluo-4 pentapotassium salt (100  $\mu\text{mol}/\text{L}$ ) was dialyzed into the cells in a pipette solution containing (in mmol/L) CsCl 110, TEACl 20, NaCl 10, GTP- $\text{Na}^+$  0.4, Mg-ATP 5, Hepes 10,  $\text{MgCl}_2$  1, pH adjusted to 7.2 with CsOH. The bath solution contained (mmol/L): NaCl 140, KCl 5,  $\text{MgCl}_2$  0.5,  $\text{CaCl}_2$  1.8,  $\text{NaH}_2\text{PO}_4$  0.33, glucose 10 and Hepes 10, pH adjusted to 7.4 with NaOH. After establishing whole-cell mode, the cells were switched to recording bath solution containing (mmol/L) NaCl 140, CsCl 10,  $\text{MgCl}_2$  1,  $\text{CaCl}_2$  1.8,  $\text{NaH}_2\text{PO}_4$  0.33, glucose 10, Hepes 10, and TTX 0.02, pH 7.4. The cells were clamped to a holding potential of  $-80$  mV. Prior to the test pulses, five (for cells infected with WT  $\beta_{2a}$ ) or 10 (for other groups) prepulse stimulations (300 ms at  $0$  mV from  $-80$  mV, 1 Hz) were applied to approximate similar SR loading amongst treatment groups. We used a ramp depolarization to  $-40$  mV from  $-80$  mV (600 ms) followed by a holding command at  $-40$  mV for 100 ms prior to applying voltage command steps ranging from  $-30$  to  $+50$  mV in 10 mV increments (500 ms). We applied the voltage command at 15 sec intervals. Confocal images were acquired at a sampling rate of 1.92 ms per line (512 pixels per line  $\times$  1000 lines), with the scanline along the long axis of the ventricular myocytes.

**Single  $\text{Ca}_v1.2$  channel recordings.** Single  $\text{Ca}_v1.2$  channel recordings were made using two patch-clamp configurations. Cell attached mode recordings were used to estimate the activity of  $\text{Ca}_v1.2$  in situ. Inside-out recordings from excised cell membrane patches

allowed us to apply exogenous, autophosphorylated, and constitutively active CaMKII to the bath (cytoplasmic) solutions. For both cell attached and inside-out configuration recordings the pipette solution contained (mmol/L):  $\text{BaCl}_2$  110, Hepes 10, TTX 0.03, and the pH was adjusted with Trizma base to 7.4. LTCC currents were recorded from excised cell membrane patches in response to depolarizing steps to  $0$  mV (500 ms) from a holding potential  $-80$  mV (0.5 Hz). Nifedipine 100 mmol/L was used at the end of experiments to confirm that recordings were from LTCC currents. The bath solution contained (mmol/L): KCl 150, EGTA 10, Hepes 10,  $\text{CaCl}_2$  7.5 or 11, glucose 5.5, EDTA 1, and ATP 0.01; the pH was adjusted to 7.4 with 10 N KOH. For some cell attached studies we used an alternative bath solution—(mmol/L): KCl 145,  $\text{MgCl}_2$  2,  $\text{CaCl}_2$  0.1, and Hepes 10, with the pH adjusted to 7.4 with KOH. This alternate solution contained 0.1 mmol/L  $\text{Ca}^{2+}$  to reduce the possibility of intracellular  $\text{Ca}^{2+}$  depletion. However, we did not detect differences in LTCC currents recorded using either bath solution. Currents were sampled at 20 kHz and low-pass filtered at 2 kHz using a four-pole Bessel filter. Only patches containing a single  $\text{Ca}^{2+}$  channel were analyzed. All single-channel recordings were analyzed using Clampfit10 software. We estimated the Po for each active sweep and estimated the open times with Gaussian or two-exponential fits. The dwell-time histograms where time values were plotted on a log scale were fitted as a Gaussian distribution. When the time value was plotted on a linear scale the data were fit with two exponentials. Modal gating analysis was performed as previously described. (12, 13)

**Cell pacing and viability measurements.** Dissociated ventricular myocytes were cultured on 12-mm-diameter (glass #1) cover glasses placed into four-well Nunclon Delta Treated dishes (10 coverslips in each well). We used morphology and Trypan blue staining to estimate cell viability (13). Prior to pacing (after 24 h in culture in the presence of adenovirus) and at each other time point, 2–3 coverslips were taken from each well and exposed to 0.1% Trypan blue dissolved in normal Tyrode solution for 5 min. The number of stained and unstained cells was counted on five randomly chosen fields of view on a coverslip at 200x (Olympus, CK 2). Cultured ventricular myocytes were paced up to 24 h by field stimulation (Ion Optix C-pace and C-dish, 1 Hz, 35 V, 2 ms) in Hank's Balanced Salt Solution (1 mmol/L  $\text{CaCl}_2$ ,  $37^\circ\text{C}$ ). Cell suspensions were concentrated by centrifugation (1 min /75 g) and a 25  $\mu\text{L}$  aliquot of the cell pellet was mixed with an equal volume of counting media (1% glutaraldehyde in modified Tyrode's solution containing 1% Trypan blue). The cells were examined microscopically at 100x magnification to determine the morphology (rod, round, or square) and the permeability of these cells to Trypan blue. Viable cells were analyzed as cells with a rod-shaped morphology and a length/width ratio of more than 3/1 and expressed as a percentage of total cells counted. The total count always exceeded 50 cells and was completed within 15 min to preclude nonspecific uptake of Trypan blue by the cells.

**Mathematical modeling.** The model was updated to include dynamic activation of CaMKII by  $\text{Ca}^{2+}$ /calmodulin and downstream regulation of  $I_{\text{Ca}}$ , SR  $\text{Ca}^{2+}$  release, and SR  $\text{Ca}^{2+}$  uptake (14, 15). Mode 2 gating was simulated as in Tanskanen et al., by decreasing the rate constant for the transition from the open state to first closed state by a factor of 10 (16). The fraction of mode 2 channels was made a function of CaMKII activity.  $\beta_{2a}$  expression was simulated by increasing peak  $I_{\text{Ca}}$  by a factor of two. The T498A  $\beta_{2a}$  mutant was simulated by eliminating the effect of CaMKII on the LTCC (peak  $\text{Ca}^{2+}$  current increase was the same as WT). The models were paced to steady-state at a cycle length of 1 Hz.

Complete LRd equations and definitions may be found in a previous publication (17). Here we provide equations and parameters that differ from the original model.

**L-type Ca<sup>2+</sup> current,  $I_{Ca(L)}$ .**

We use the L-type Ca<sup>2+</sup> channel Markov model developed by Faber et al. (17) with the following modifications to account for CaMKII regulation of mode 2 gating and channel inactivation. Mode 2 gating is simulated by decreasing the rate constant for the transition from the open state to first closed state ( $\beta_3$ ) by a factor of 10 (16).

Mode 2 gating:

$$\beta_3 = 0.4 \cdot \beta$$

$$\beta = 0.39 \cdot \exp(-V_m/40)$$

$$\text{Fraction of Mode 2 channels} = \bar{\Delta} \text{frac}_{M2, CaMK} / (1 + (K_{m, CaMK} / CaMKII_{\text{active}})^h)$$

$$\bar{\Delta} \text{frac}_{M2, CaMK} = 0.3; \quad K_{m, CaMK} = 0.04; \quad h = 5.0$$

$$\phi_f = (0.02 - \Delta \phi_{f, CaMK}) \cdot \exp(V_m/500)$$

$$\Delta \phi_{f, CaMK} = \bar{\Delta} \phi_{f, CaMK} / (1 + (K_{m, CaMK} / CaMKII_{\text{active}})^h)$$

$$\bar{\Delta} \phi_{f, CaMK} = 0.015; \quad K_{m, CaMK} = 0.05; \quad h = 5.0$$

$$\phi_s = (0.03 - \Delta \phi_{s, CaMK}) \cdot \exp(V_m / -280)$$

$$\Delta \phi_{s, CaMK} = \bar{\Delta} \phi_{s, CaMK} / (1 + (K_{m, CaMK} / CaMKII_{\text{active}})^h)$$

$$\bar{\Delta} \phi_{s, CaMK} = 0.005; \quad K_{m, CaMK} = 0.05; \quad h = 5.0$$

To simulate  $\beta_{2a}$  mutant activity,  $\bar{\Delta} \text{frac}_{M2, CaMK} = \bar{\Delta} \phi_{f, CaMK} = \bar{\Delta} \phi_{s, CaMK} = 0.0$ .

To simulate  $\beta_{2a}$  WT or mutant overexpression,  $P_{Ca} = 0.0126$  cm/s.

**SR Ca<sup>2+</sup> release,  $I_{rel}$ .**

$$\gamma_{SR} = (8.4 - \Delta \gamma_{SR, CaMK}) \cdot [Ca^{2+}]_{ss}$$

$$\Delta \gamma_{SR, CaMK} = \bar{\Delta} \gamma_{SR, CaMK} / (1 + (K_{m, CaMK} + CaMKII_{\text{active}})^h)$$

$$\bar{\Delta} \gamma_{SR, CaMK} = 5.0; \quad K_{m, CaMK} = 0.05; \quad h = 5.0$$

**SR Ca<sup>2+</sup> uptake,  $I_{up}$ .**

The mathematical formulation for CaMKII regulation of SR Ca<sup>2+</sup> uptake by is taken from our previous publications (15, 16):

$$I_{up} = \bar{I}_{up} \cdot \frac{[Ca^{2+}]_i}{[Ca^{2+}]_i + K_{m, up} - \Delta K_{m, PLB, CaMK}}$$

$$\Delta K_{m, PLB, CaMK} = \bar{\Delta} K_{m, PLB, CaMK} / (1 + (K_{m, CaMK} / CaMKII_{\text{active}})^h)$$

$$\bar{\Delta} K_{m, PLB} = 0.00017 \text{ mmol/L}; \quad K_{m, CaMK} = 0.05;$$

$$h = 5.0; \quad \bar{I}_{up} = 0.017325$$

**CaMKII.**

The mathematical equations describing CaMKII activity are the same as published previously (15, 16):

$$CaMKII_{\text{bound}} = CaMKII_o \cdot (1 - CaMKII_{\text{trap}}) / (1 + K_{m, CaMK} / [Ca^{2+}]_{ss})$$

$$\frac{dCaMKII_{\text{trap}}}{dt} = \alpha_{CaMK} \cdot CaMKII_{\text{bound}} \cdot (CaMKII_{\text{bound}} + CaMKII_{\text{trap}}) - \beta_{CaMK} \cdot CaMKII_{\text{trap}}$$

$$CaMKII_{\text{active}} = CaMKII_{\text{bound}} + CaMKII_{\text{trap}}$$

$$\alpha_{CaMK} = 0.0006 \text{ ms}^{-1}; \quad \beta_{CaMK} = 0.00003 \text{ ms}^{-1}$$

$$CaMKII_o = 0.05; \quad K_{m, CaM} = 0.001 \text{ mmol/L}$$

- Grueter CE, et al. (2006) L-type Ca<sup>2+</sup> channel facilitation mediated by phosphorylation of the beta subunit by CaMKII. *Mol Cell*, 23:641–650.
- Chang BH, Mukherji S, Soderling TR (1998) Characterization of a calmodulin kinase II inhibitor protein in brain. *Proc Natl Acad Sci USA*, 95:10890–10895.
- Singh MV, et al. (2009) Ca<sup>2+</sup>/calmodulin-dependent kinase II triggers cell membrane injury by inducing complement factor B gene expression in the mouse heart. *J Clin Invest*, 119:986–996.
- Erickson JR, et al. (2008) A dynamic pathway for calcium-independent activation of CaMKII by methionine oxidation. *Cell*, 133:462–474.
- Gupta RC, Kranias EG (1989) Purification and characterization of a calcium-calmodulin-dependent phospholamban kinase from canine myocardium. *Biochemistry*, 28:5909–5916.
- Wu Y, et al. (2009) Calmodulin kinase II is required for fight or flight sinoatrial node physiology. *Proc Natl Acad Sci USA*, 106:5972–5977.
- Chen B, Wu Y, Mohler PJ, Anderson ME, Song LS (2009) Local control of Ca<sup>2+</sup>-induced Ca<sup>2+</sup> release in mouse sinoatrial node cells. *J Mol Cell Cardiol*, 47:706–715.
- Wu Y, MacMillan LB, McNeill RB, Colbran RJ, Anderson ME (1999) CaM kinase augments cardiac L-type Ca<sup>2+</sup> current: A cellular mechanism for long Q-T arrhythmias. *Am J Physiol*, 276:H2168–H2178.
- Wu Y, Dzshura I, Colbran RJ, Anderson ME (2001) Calmodulin kinase and a calmodulin-binding "IQ" domain facilitate L-type Ca<sup>2+</sup> current in rabbit ventricular myocytes by a common mechanism. *J Physiol*, 535:679–687.
- Rae J, Cooper K, Gates P, Watsky M (1991) Low access resistance perforated patch recordings using amphotericin B. *J Neurosci Methods*, 37:15–26.
- Zhang R, et al. (2005) Calmodulin kinase II inhibition protects against structural heart disease. *Nat Med*, 11:409–417.
- Dzhura I, Wu Y, Colbran RJ, Balsler JR, Anderson ME (2000) Calmodulin kinase determines calcium-dependent facilitation of L-type calcium channels. *Nat Cell Biol*, 2:173–177.
- Chen X, et al. (2005) Ca<sup>2+</sup> influx-induced sarcoplasmic reticulum Ca<sup>2+</sup> overload causes mitochondrial-dependent apoptosis in ventricular myocytes. *Circ Res*, 97:1009–1017.
- Hund TJ, et al. (2008) Role of activated CaMKII in abnormal calcium homeostasis and INa remodeling after myocardial infarction: Insights from mathematical modeling. *J Mol Cell Cardiol*, 45:420–428.
- Hund TJ, Rudy Y (2004) Rate dependence and regulation of action potential and calcium transient in a canine cardiac ventricular cell model. *Circulation*, 110:3168–3174.
- Tanskanen AJ, Greenstein JL, O'Rourke B, Winslow RL (2005) The role of stochastic and modal gating of cardiac L-type Ca<sup>2+</sup> channels on early afterdepolarizations. *Biophys J*, 88:85–95.
- Faber GM, Silva J, Livshitz L, Rudy Y (2007) Kinetic properties of the cardiac L-type Ca<sup>2+</sup> channel and its role in myocyte electrophysiology: A theoretical investigation. *Biophys J*, 92:1522–1543.
